# Supplementary material for: In situ and real-time vibrational spectroscopic characterizations of the photodegradation of nitrite in the presence of methanediol
Source: Royal Society of Chemistry journal article supplement (doi:10.1039/d3cp00454f), 2023-01-01
Supplement: d3cp00454f1.pdf [file d3cp00454f1.pdf]

## Supporting Information

# *In-situ* and real-time vibrational spectroscopic characterizations of the photodegradation of nitrite in the presence of methanediol

*Chiao-Mi Cheng,<sup>1</sup> Cheng-Zong Lu,<sup>1</sup> Chun-Yao Hou,<sup>1</sup> Yuan-Jyun Jhao,<sup>1</sup> Yi-Fen Lai,<sup>2</sup> I-Chia*

*Chen,<sup>1</sup> Yi-Hsueh Chuang,<sup>2</sup> and Li-Kang Chu<sup>1,\*</sup>*

<sup>1</sup> Department of Chemistry, National Tsing Hua University, 101, Sec. 2, Kuang-Fu Road, Hsinchu, Taiwan 300044

<sup>2</sup> Institute of Environmental Engineering, National Yang Ming Chiao Tung University, 1001 University Road, Hsinchu, Taiwan 300093

### Corresponding Author

\*To whom correspondence should be addressed. Phone: 886-3-5715131 ext. 33396. Fax: 886-3-5711082. E-mail: lkchu@mx.nthu.edu.tw.

## *Table of contents*

### **Supplementary figures**

**Figure S1.** Triplicate experiments of the time-evolved difference infrared spectra of  $\text{NaNO}_2$  aqueous solution in the presence of  $\text{CH}_2(\text{OH})_2$  at different concentrations upon continuous 365-nm photoexcitation.

**Figure S2.** Stack and contour plots of the time-evolved difference infrared spectra of the aqueous mixtures of  $\text{NaNO}_2$  and  $\text{CH}_2(\text{OH})_2$  upon continuous 365-nm photoexcitation at high irradiation power.

**Figure S3.** Triplicate experiments of the time-evolved Raman spectra of the mixture containing  $\text{NaNO}_2$  and  $\text{CH}_2(\text{OH})_2$  upon continuous 365-nm photoexcitation.

**Figure S4.** The original data of ion chromatographic plots for the mixture containing  $\text{NaNO}_2$  and  $\text{CH}_2(\text{OH})_2$  upon 365-nm photoexcitation at different time slots.

**Figure S5.** Chromatograms of the vapor in the headspace of the  $\text{NaNO}_2/\text{CH}_2(\text{OH})_2$  aqueous mixture upon 365-nm excitation, 10%  $\text{N}_2\text{O}$  in  $\text{N}_2$ , and pure  $\text{CO}_2$  obtained from the gas chromatography.

### **Supplementary tables**

**Table S1.** The optimized molecular structures of relevant species in water.

**Table S2.** The predicted Gibbs free energies of relevant species in water.

**Table S3.** The predicted Gibbs free energies of the relevant reactions in water.

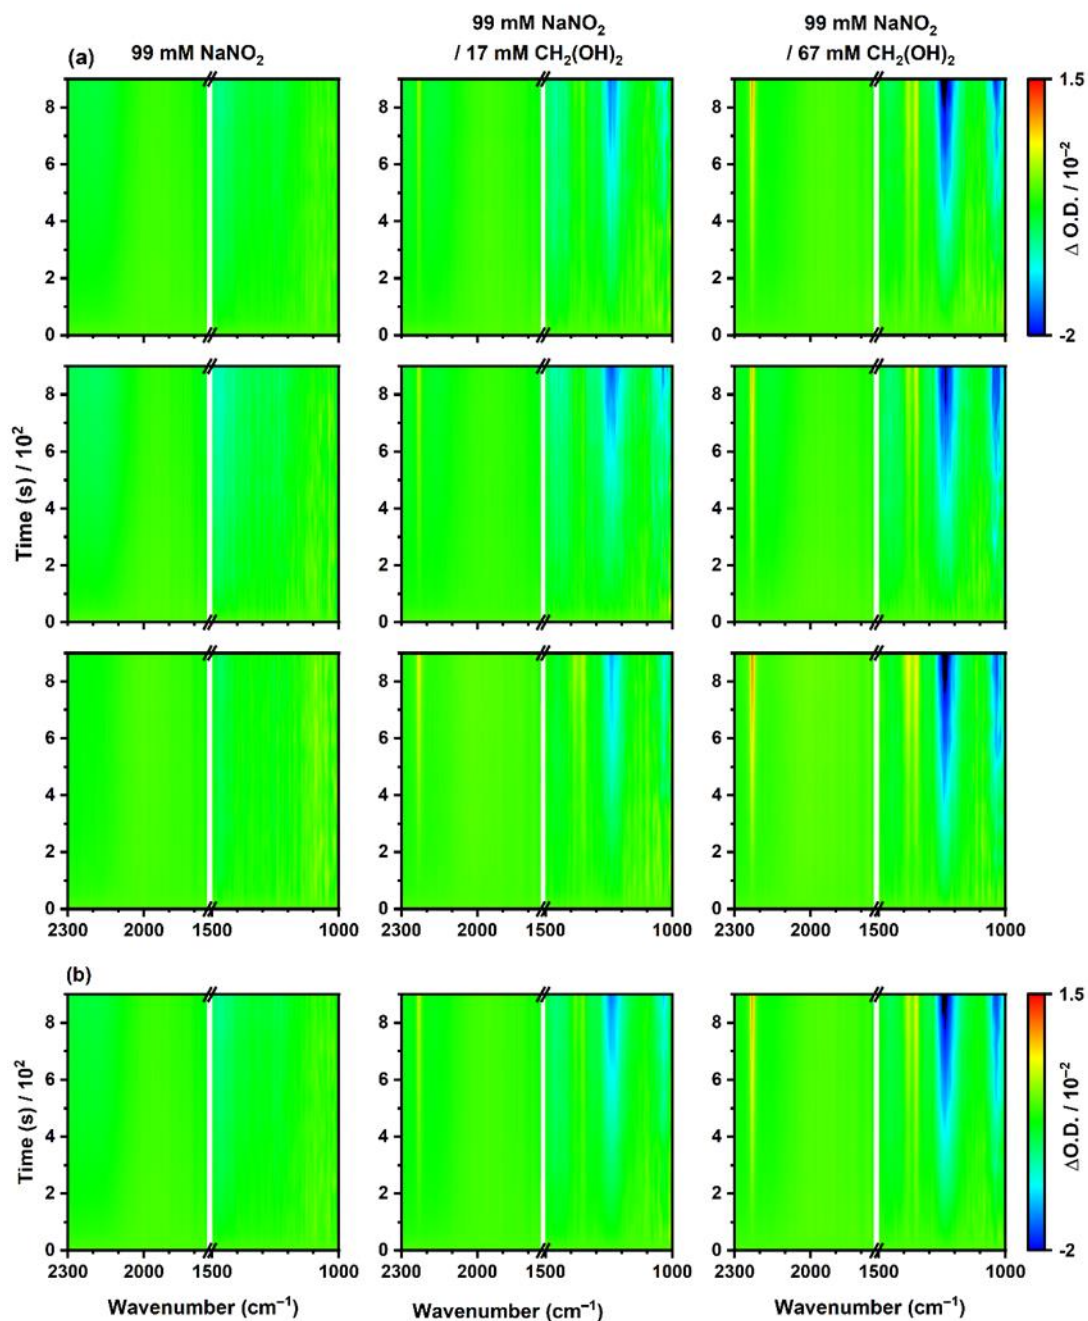

**Figure S1.** (a) Triplicate experiments of the time-evolved difference infrared spectra of 99 mM  $\text{NaNO}_2$  aqueous solution in the presence of  $\text{CH}_2(\text{OH})_2$  at concentrations of 0, 17, and 67 mM upon continuous 365-nm photoexcitation ( $167 \pm 9 \text{ mJ cm}^{-2}$ ). (b) The corresponding averaged spectra. The results of the mixture of 99 mM  $\text{NaNO}_2$  and 67 mM  $\text{CH}_2(\text{OH})_2$  were replotted as (i) stack and (ii) contour plots in **Figure 4a**, respectively.

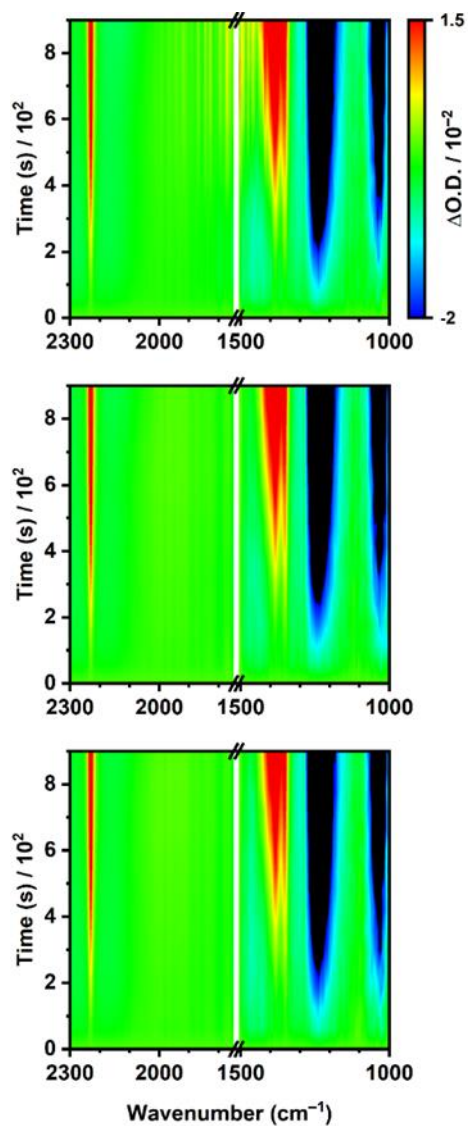

**Figure S2.** The contour plots of the triplicate results of the time-evolved difference infrared spectra upon continuous 365-nm photoexcitation ( $473 \pm 3 \text{ mJ cm}^{-2}$ ) of the aqueous mixtures of 99 mM  $\text{NaNO}_2$  and 67 mM  $\text{CH}_2(\text{OH})_2$ .

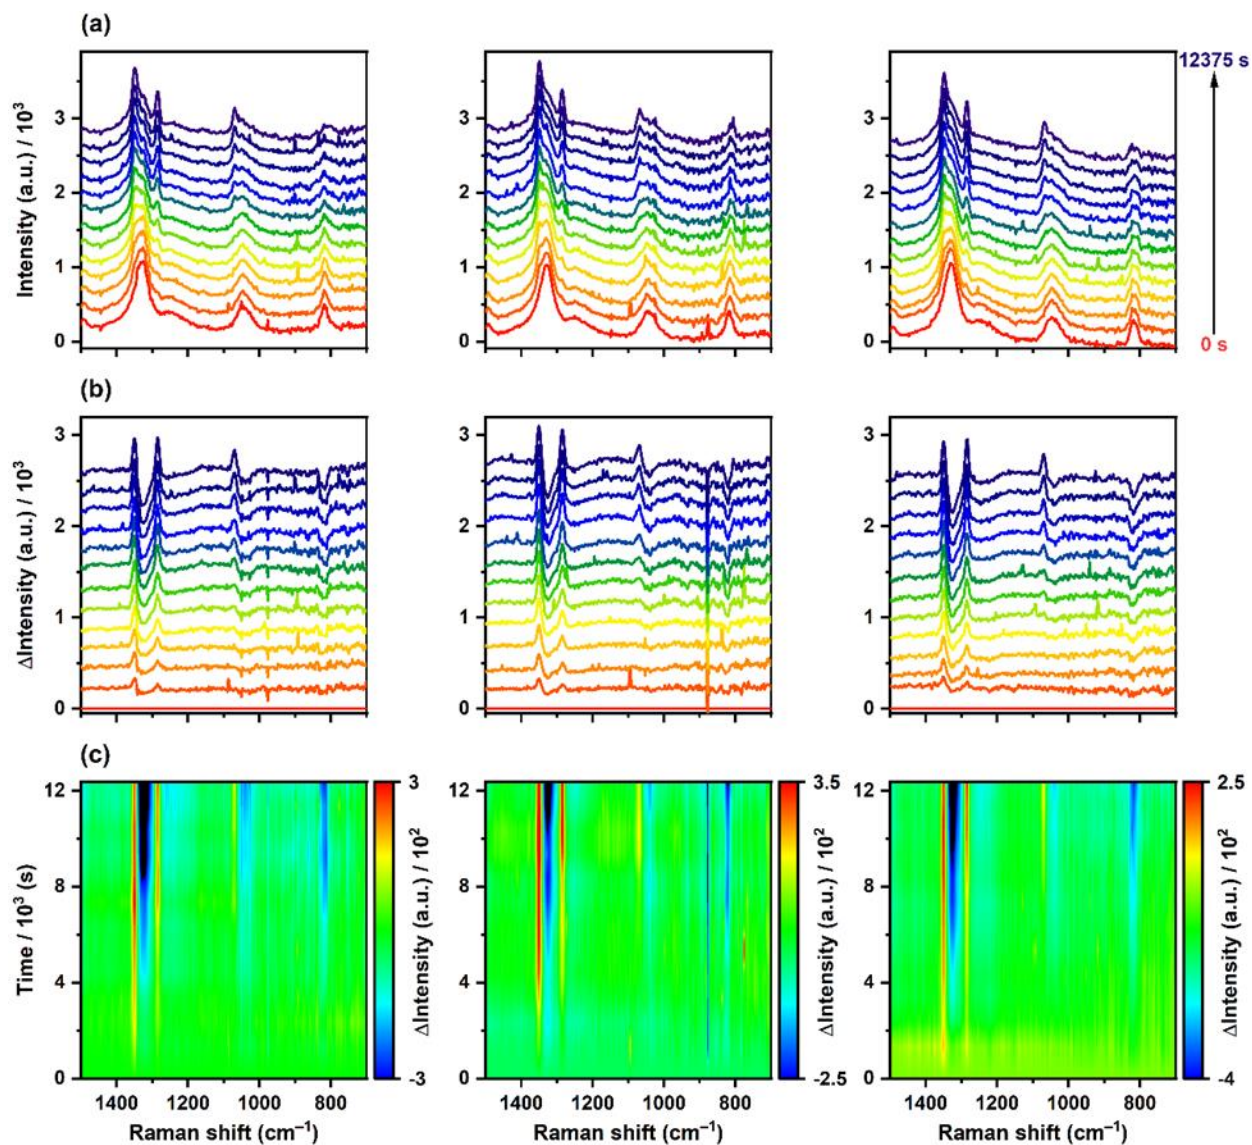

**Figure S3.** (a) Triplicate experiments of the time-evolved Raman spectra of the mixture containing 99 mM of  $\text{NaNO}_2$  and 67 mM of  $\text{CH}_2(\text{OH})_2$  upon continuous 365-nm photoexcitation at  $195 \pm 11 \text{ mJ cm}^{-2}$ . The corresponding time-resolved difference Raman spectra with respect to the unphotolyzed samples shown as (b) stack plot and (c) contour plot. The averaged spectra on (b) and (c) are shown in frames i and ii of **Figure 4c**, respectively.

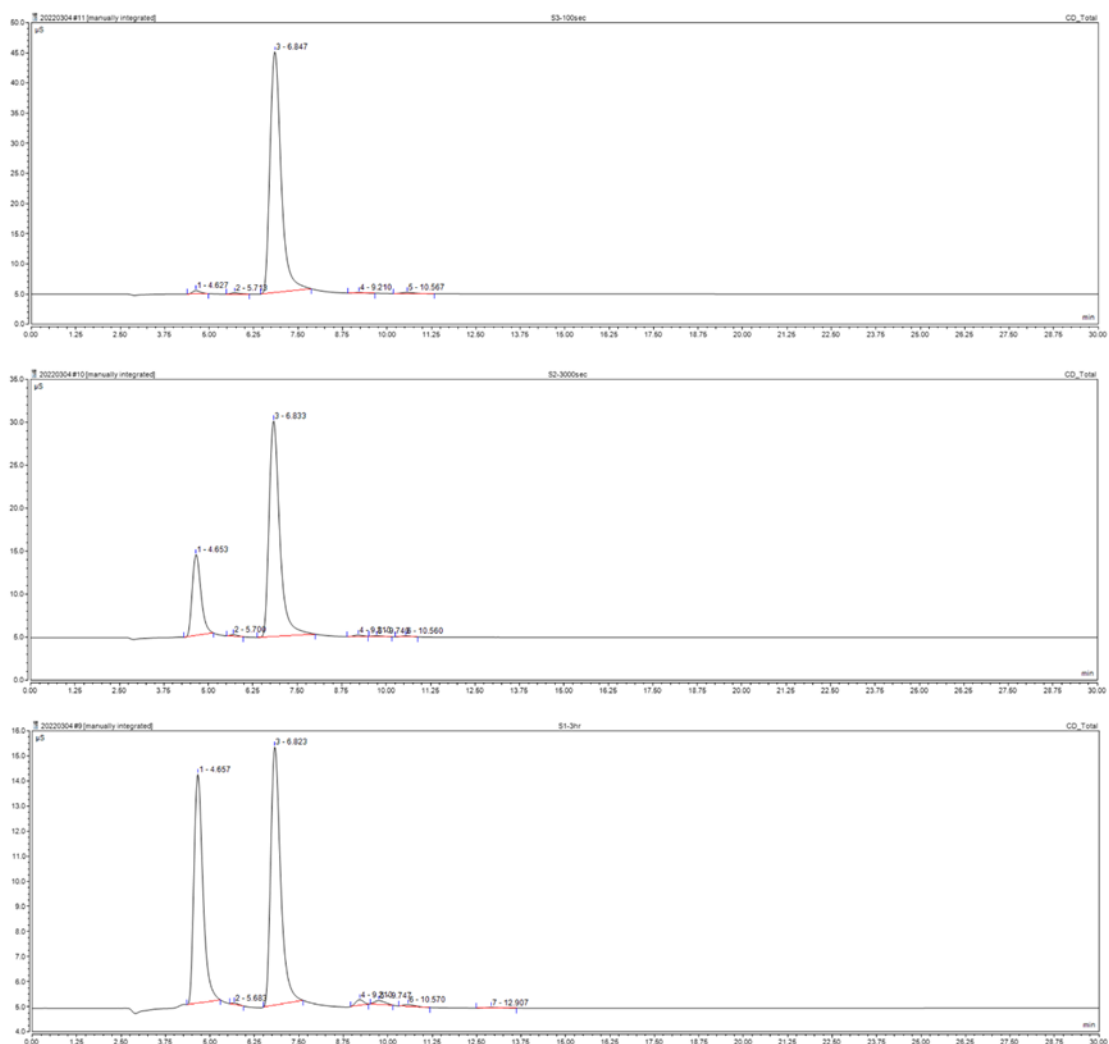

**Figure S4.** The original data of ion chromatographic plots for the mixture containing 99 mM  $\text{NaNO}_2$  and 67 mM  $\text{CH}_2(\text{OH})_2$  upon 365-nm excitation ( $867 \pm 13 \text{ mJ cm}^{-2}$ ) at different time slots: 100 s, 3000 s, and 10800 s. The thickened lines and scales of the frames are shown in **Figure 5**.

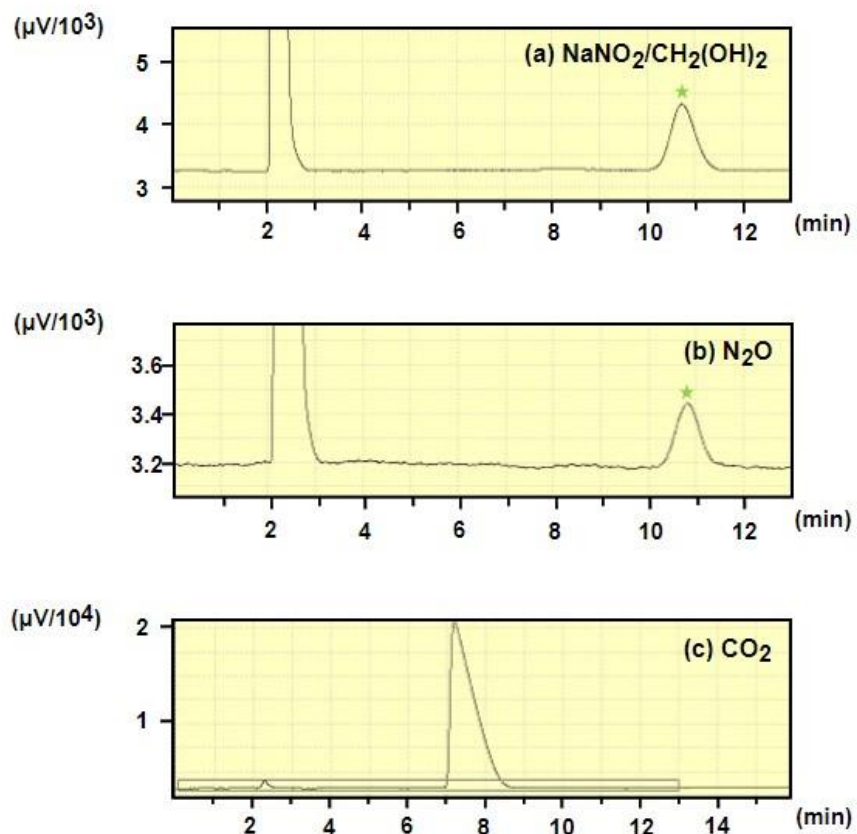

**Figure S5.** Chromatograms of (a) the vapor in the headspace of the mixture containing  $\text{NaNO}_2$  /  $\text{CH}_2(\text{OH})_2 = 98.9 \text{ mM}$  /  $66.7 \text{ mM}$  upon 365-nm excitation for 3.5 hours, (b) 10 %  $\text{N}_2\text{O}$  diluted in  $\text{N}_2$ , and (c) pure  $\text{CO}_2$  obtained from the gas chromatography.

**Table S1.** The optimized molecular structures of relevant species in water using the B3LYP density functional theory method with basis sets of aug-cc-pVTZ and C-PCM to account for the solvent effect.

| Molecule                     | Molecule Structure                                                                  | Cartesian coordinate |           |            |            |
|------------------------------|-------------------------------------------------------------------------------------|----------------------|-----------|------------|------------|
|                              |                                                                                     | Atom                 | X         | Y          | Z          |
| NO                           | 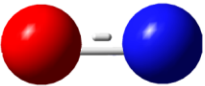   | N                    | 0.0000000 | 0.0000000  | -0.6105960 |
|                              |                                                                                     | O                    | 0.0000000 | 0.0000000  | 0.5342720  |
|                              |                                                                                     |                      |           |            |            |
| NO <sup>-</sup>              | 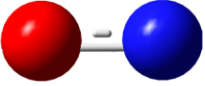   | N                    | 0.0000000 | 0.0000000  | -0.6632440 |
|                              |                                                                                     | O                    | 0.0000000 | 0.0000000  | 0.5803380  |
|                              |                                                                                     |                      |           |            |            |
| NO <sub>2</sub>              | 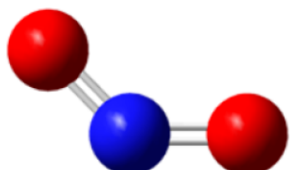  | N                    | 0.0000000 | 0.0000000  | 0.3208450  |
|                              |                                                                                     | O                    | 0.0000000 | 1.0977090  | -0.1403700 |
|                              |                                                                                     | O                    | 0.0000000 | -1.0977090 | -0.1403700 |
|                              |                                                                                     |                      |           |            |            |
| N <sub>2</sub> O             | 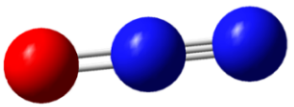 | N                    | 0.0000000 | 0.0000000  | -0.0741330 |
|                              |                                                                                     | N                    | 0.0000000 | 0.0000000  | -1.1937770 |
|                              |                                                                                     | O                    | 0.0000000 | 0.0000000  | 1.1094210  |
|                              |                                                                                     |                      |           |            |            |
| NO <sub>2</sub> <sup>-</sup> | 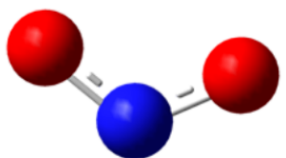 | N                    | 0.0000000 | 0.0000000  | 0.4594880  |
|                              |                                                                                     | O                    | 0.0000000 | 1.0661320  | -0.2010260 |
|                              |                                                                                     | O                    | 0.0000000 | -1.0661320 | -0.2010260 |
|                              |                                                                                     |                      |           |            |            |

|                               |                                                                                     |      |            |            |            |
|-------------------------------|-------------------------------------------------------------------------------------|------|------------|------------|------------|
| <i>c</i> -HONO                | 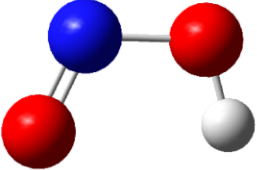   | Atom | X          | Y          | Z          |
|                               |                                                                                     | N    | 0.0000000  | 0.5423420  | 0.0000000  |
|                               |                                                                                     | O    | 1.0864950  | 0.0845170  | 0.0000000  |
|                               |                                                                                     | O    | -1.0129460 | -0.3987760 | 0.0000000  |
|                               |                                                                                     | H    | -0.5883930 | -1.2823250 | 0.0000000  |
| <i>t</i> -HONO                | 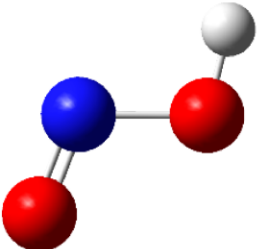   | Atom | X          | Y          | Z          |
|                               |                                                                                     | N    | -0.1673210 | 0.4848420  | 0.0000000  |
|                               |                                                                                     | O    | -1.1007490 | -0.2213050 | 0.0000000  |
|                               |                                                                                     | O    | 1.0319030  | -0.2562360 | 0.0000000  |
|                               |                                                                                     | H    | 1.7220220  | 0.4264430  | -0.0000010 |
| NO <sub>3</sub> <sup>-</sup>  | 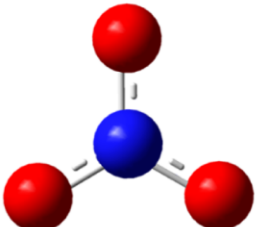  | Atom | X          | Y          | Z          |
|                               |                                                                                     | N    | 0.0000000  | 0.0000000  | 0.0001960  |
|                               |                                                                                     | O    | 0.0000000  | 1.2557760  | -0.0000570 |
|                               |                                                                                     | O    | -1.0875340 | -0.6278880 | -0.0000570 |
|                               |                                                                                     | O    | 1.0875340  | -0.6278880 | -0.0000570 |
| N <sub>2</sub> O <sub>3</sub> | 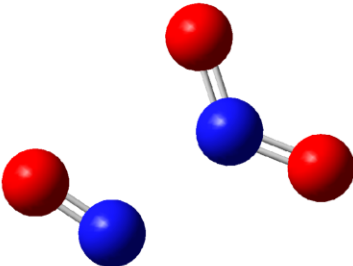 | Atom | X          | Y          | Z          |
|                               |                                                                                     | N    | 0.0000000  | 0.6431000  | 0.0000000  |
|                               |                                                                                     | O    | 1.2033870  | 0.6627810  | 0.0000000  |
|                               |                                                                                     | O    | -0.7787640 | 1.5619780  | 0.0000000  |
|                               |                                                                                     | N    | -0.6995770 | -1.1205810 | 0.0000000  |
|                               |                                                                                     | O    | 0.1875060  | -1.8069630 | 0.0000000  |

|                               |                                                                                     |      |            |            |            |
|-------------------------------|-------------------------------------------------------------------------------------|------|------------|------------|------------|
| N <sub>2</sub> O <sub>4</sub> | 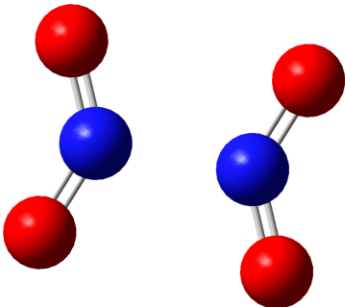   | Atom | X          | Y          | Z          |
|                               |                                                                                     | N    | 0.8958810  | -0.0000520 | 0.0000170  |
|                               |                                                                                     | N    | -0.8960370 | 0.0000200  | -0.0000200 |
|                               |                                                                                     | O    | 1.3535260  | 1.0932590  | 0.0001230  |
|                               |                                                                                     | O    | 1.3537440  | -1.0931350 | -0.0001320 |
|                               |                                                                                     | O    | -1.3535700 | 1.0931590  | -0.0001220 |
|                               |                                                                                     | O    | -1.3535650 | -1.0932570 | 0.0001340  |
| H <sup>+</sup>                | 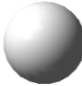   | Atom | X          | Y          | Z          |
|                               |                                                                                     | H    | 0.0000000  | 0.0000000  | 0.0000000  |
| HO <sub>2</sub>               | 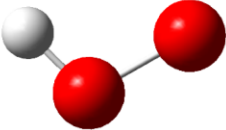   | Atom | X          | Y          | Z          |
|                               |                                                                                     | O    | 0.0552890  | -0.6077940 | 0.0000000  |
|                               |                                                                                     | H    | -0.8846240 | -0.8770750 | 0.0000000  |
|                               |                                                                                     | O    | 0.0552890  | 0.7174290  | 0.0000000  |
| HNO                           | 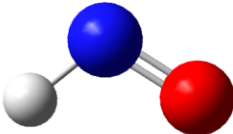 | Atom | X          | Y          | Z          |
|                               |                                                                                     | N    | 0.0622290  | 0.5789260  | 0.0000000  |
|                               |                                                                                     | H    | -0.9334410 | 0.9239620  | 0.0000000  |
|                               |                                                                                     | O    | 0.0622290  | -0.6220550 | 0.0000000  |
| H <sub>2</sub> O              | 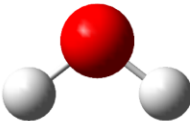 | Atom | X          | Y          | Z          |
|                               |                                                                                     | O    | 0.0000000  | 0.0000000  | 0.1178240  |
|                               |                                                                                     | H    | 0.0000000  | 0.7619710  | -0.4712970 |
|                               |                                                                                     | H    | 0.0000000  | -0.7619710 | -0.4712970 |

|                               |                                                                                     |      |            |            |            |
|-------------------------------|-------------------------------------------------------------------------------------|------|------------|------------|------------|
| CO <sub>2</sub>               | 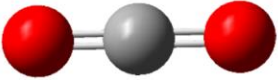   | Atom | X          | Y          | Z          |
|                               |                                                                                     | C    | 0.0000000  | 0.0000000  | 0.0000000  |
|                               |                                                                                     | O    | 0.0000000  | 0.0000000  | 1.1601680  |
|                               |                                                                                     | O    | 0.0000000  | 0.0000000  | -1.1601680 |
| CO <sub>2</sub> <sup>-</sup>  | 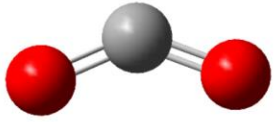   | Atom | X          | Y          | Z          |
|                               |                                                                                     | C    | 0.0000000  | 0.0000000  | 0.3376020  |
|                               |                                                                                     | O    | 0.0000000  | 1.1426640  | -0.1266010 |
|                               |                                                                                     | O    | 0.0000000  | -1.1426640 | -0.1266010 |
| HCOO <sup>-</sup>             | 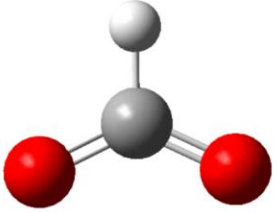   | Atom | X          | Y          | Z          |
|                               |                                                                                     | C    | 0.0000000  | 0.3318110  | 0.0000000  |
|                               |                                                                                     | H    | -0.0012470 | 1.4503280  | 0.0000000  |
|                               |                                                                                     | O    | 1.1286870  | -0.2142450 | 0.0000000  |
|                               |                                                                                     | O    | -1.1285310 | -0.2159050 | 0.0000000  |
| CO <sub>3</sub> <sup>2-</sup> | 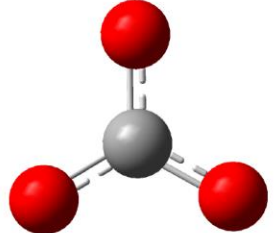  | Atom | X          | Y          | Z          |
|                               |                                                                                     | C    | 0.0000000  | 0.0000000  | -0.0009160 |
|                               |                                                                                     | O    | 0.0000000  | 0.0000000  | 1.2978880  |
|                               |                                                                                     | O    | 0.0000000  | 1.1247580  | -0.6486010 |
|                               |                                                                                     | O    | 0.0000000  | -1.1247580 | -0.6486010 |
| <i>c</i> -HCOOH               | 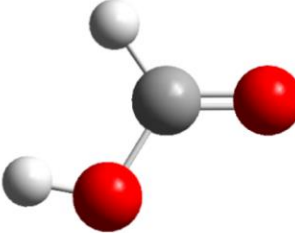 | Atom | X          | Y          | Z          |
|                               |                                                                                     | C    | 0.1251060  | 0.3682730  | -0.0001010 |
|                               |                                                                                     | H    | 0.0360060  | 1.4626100  | 0.0000980  |
|                               |                                                                                     | O    | 1.1715200  | -0.2208140 | 0.0000470  |
|                               |                                                                                     | O    | -1.0469060 | -0.2814390 | -0.0000230 |
|                               |                                                                                     | H    | -1.7835620 | 0.3457800  | 0.0003160  |

|                               |                                                                                     |      |            |            |            |
|-------------------------------|-------------------------------------------------------------------------------------|------|------------|------------|------------|
| <i>t</i> -HCOOH               | 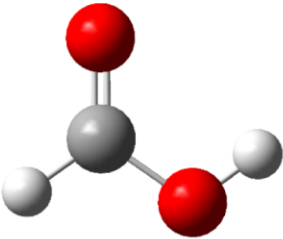   | Atom | X          | Y          | Z          |
|                               |                                                                                     | C    | 0.0000000  | 0.4201010  | 0.0000000  |
|                               |                                                                                     | H    | -0.3642030 | 1.4519880  | 0.0000000  |
|                               |                                                                                     | O    | 1.1615580  | 0.1033390  | 0.0000000  |
|                               |                                                                                     | O    | -1.0297680 | -0.4321000 | 0.0000000  |
|                               |                                                                                     | H    | -0.6901170 | -1.3425050 | 0.0000000  |
| CH <sub>2</sub> OH            | 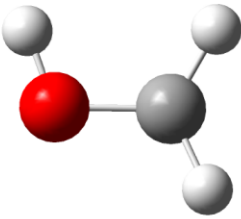   | Atom | X          | Y          | Z          |
|                               |                                                                                     | C    | 0.6853260  | 0.0272060  | -0.0555160 |
|                               |                                                                                     | H    | 1.2406360  | -0.8829180 | 0.1032800  |
|                               |                                                                                     | H    | 1.1098240  | 1.0016350  | 0.1359890  |
|                               |                                                                                     | O    | -0.6700080 | -0.1269080 | 0.0152240  |
|                               |                                                                                     | H    | -1.1023480 | 0.7333100  | -0.0279620 |
| HCO <sub>3</sub> <sup>-</sup> | 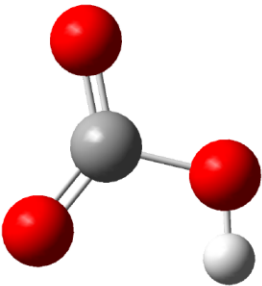  | Atom | X          | Y          | Z          |
|                               |                                                                                     | C    | 0.0000000  | 0.1500050  | 0.0000000  |
|                               |                                                                                     | O    | 1.0216570  | 0.8588750  | 0.0000000  |
|                               |                                                                                     | O    | -1.2073720 | 0.4741530  | 0.0000000  |
|                               |                                                                                     | O    | 0.2608750  | -1.2368290 | 0.0000000  |
|                               |                                                                                     | H    | -0.6012750 | -1.6696190 | 0.0000000  |
| CH <sub>3</sub> OH            | 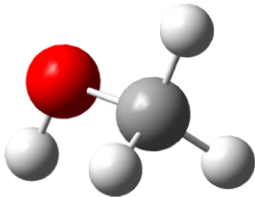 | Atom | X          | Y          | Z          |
|                               |                                                                                     | C    | 0.0472790  | 0.6694150  | 0.0000000  |
|                               |                                                                                     | H    | -0.8650990 | -1.0655190 | 0.0000000  |
|                               |                                                                                     | H    | -0.4423550 | 1.0721540  | 0.8897190  |
|                               |                                                                                     | H    | -0.4423550 | 1.0721540  | -0.8897190 |
|                               |                                                                                     | O    | 0.0472790  | -0.7602240 | 0.0000000  |
|                               |                                                                                     | H    | 1.0878960  | 0.9865150  | 0.0000000  |

|                                   |                                                                                     |      |            |            |            |
|-----------------------------------|-------------------------------------------------------------------------------------|------|------------|------------|------------|
| CH(OH) <sub>2</sub>               | 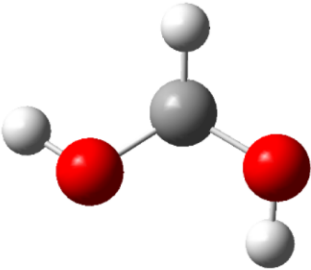   | Atom | X          | Y          | Z          |
|                                   |                                                                                     | C    | 0.0017350  | 0.4993510  | 0.1576900  |
|                                   |                                                                                     | H    | 0.0310340  | 1.4905500  | -0.2877840 |
|                                   |                                                                                     | O    | 1.0852590  | -0.3205960 | -0.0676670 |
|                                   |                                                                                     | H    | 1.8946560  | 0.1594250  | 0.1449730  |
|                                   |                                                                                     | O    | -1.1834030 | -0.1326710 | -0.0714800 |
|                                   |                                                                                     | H    | -1.1509440 | -1.0199420 | 0.3098490  |
| H <sub>2</sub> CO <sub>3</sub>    | 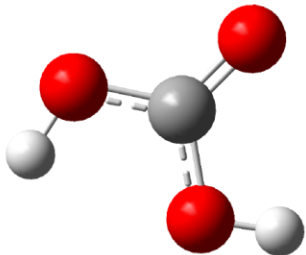   | Atom | X          | Y          | Z          |
|                                   |                                                                                     | C    | 0.0000000  | 0.1361180  | 0.0000000  |
|                                   |                                                                                     | O    | 0.9467940  | -0.8159260 | 0.0000000  |
|                                   |                                                                                     | O    | 0.2003580  | 1.3226130  | 0.0000000  |
|                                   |                                                                                     | O    | -1.2261470 | -0.3905690 | 0.0000000  |
|                                   |                                                                                     | H    | -1.1829920 | -1.3574730 | 0.0000000  |
|                                   |                                                                                     | H    | 1.8149530  | -0.3881740 | 0.0000000  |
| CH <sub>2</sub> (OH) <sub>2</sub> | 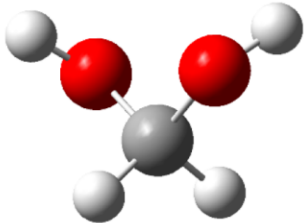 | Atom | X          | Y          | Z          |
|                                   |                                                                                     | C    | 0.0003000  | 0.5272420  | 0.0000020  |
|                                   |                                                                                     | H    | 0.0177050  | 1.1497390  | 0.8944640  |
|                                   |                                                                                     | H    | -0.0175540 | 1.1495940  | -0.8945070 |
|                                   |                                                                                     | O    | -1.1715480 | -0.2526430 | 0.1044570  |
|                                   |                                                                                     | H    | -1.3146930 | -0.7095590 | -0.7326230 |
|                                   |                                                                                     | O    | 1.1713170  | -0.2527740 | -0.1044380 |
| O <sup>-</sup>                    | 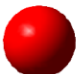 | Atom | X          | Y          | Z          |
|                                   |                                                                                     | O    | 0.0000000  | 0.0000000  | 0.0000000  |

|                                |                                                                                    |      |            |            |            |
|--------------------------------|------------------------------------------------------------------------------------|------|------------|------------|------------|
| O <sub>2</sub>                 | 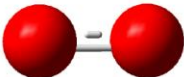  | Atom | X          | Y          | Z          |
|                                |                                                                                    | O    | 0.0000000  | 0.0000000  | 0.6025320  |
|                                |                                                                                    | O    | 0.0000000  | 0.0000000  | -0.6025320 |
| OH                             | 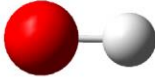  | Atom | X          | Y          | Z          |
|                                |                                                                                    | O    | 0.0000000  | 0.0000000  | 0.1084880  |
|                                |                                                                                    | H    | 0.0000000  | 0.0000000  | -0.8679000 |
| OH <sup>-</sup>                | 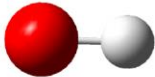  | Atom | X          | Y          | Z          |
|                                |                                                                                    | O    | 0.0000000  | 0.0000000  | 0.1069920  |
|                                |                                                                                    | H    | 0.0000000  | 0.0000000  | -0.8559380 |
| ONCO <sub>2</sub> <sup>-</sup> | 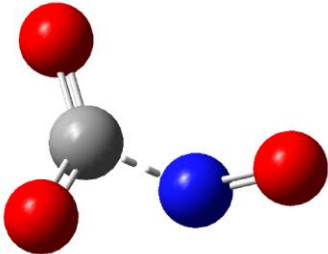 | Atom | X          | Y          | Z          |
|                                |                                                                                    | C    | 0.5515770  | -0.0000480 | -0.0423990 |
|                                |                                                                                    | O    | 1.0217870  | -1.1373780 | 0.0861030  |
|                                |                                                                                    | O    | 1.0223500  | 1.1370440  | 0.0863420  |
|                                |                                                                                    | N    | -0.8652110 | 0.0004790  | -0.5442660 |
|                                |                                                                                    | O    | -1.7007600 | -0.0000490 | 0.3355870  |

**Table S2.** The predicted Gibb's free energies of relevant species in water using the B3LYP density functional theory method with basis sets of aug-cc-pVTZ and C-PCM to account for the solvent effect. (Unit: Hartree)

| Species                       | Sum of electronic and<br>thermal Free Energies | Sum of electronic and<br>thermal Enthalpies | Sum of electronic and<br>thermal Energies | Sum of electronic and<br>zero-point Energies |
|-------------------------------|------------------------------------------------|---------------------------------------------|-------------------------------------------|----------------------------------------------|
| NO                            | -129.959320                                    | -129.936032                                 | -129.936976                               | -129.939337                                  |
| NO <sup>-</sup>               | -130.033914                                    | -130.011117                                 | -130.012062                               | -130.014428                                  |
| NO <sub>2</sub>               | -205.176501                                    | -205.149278                                 | -205.150222                               | -205.153154                                  |
| N <sub>2</sub> O              | -184.750318                                    | -184.725403                                 | -184.726347                               | -184.729023                                  |
| NO <sub>2</sub> <sup>-</sup>  | -205.359797                                    | -205.332917                                 | -205.333861                               | -205.336795                                  |
| <i>c</i> -HONO                | -205.798955                                    | -205.770856                                 | -205.771800                               | -205.774977                                  |
| <i>t</i> -HONO                | -205.800636                                    | -205.772484                                 | -205.773428                               | -205.776655                                  |
| NO <sub>3</sub> <sup>-</sup>  | -280.589763                                    | -280.561204                                 | -280.562148                               | -280.565313                                  |
| N <sub>2</sub> O <sub>3</sub> | -335.135779                                    | -335.101632                                 | -335.102576                               | -335.107578                                  |
| N <sub>2</sub> O <sub>4</sub> | -410.353447                                    | -410.317887                                 | -410.318831                               | -410.324138                                  |
| H <sup>+</sup>                | -0.174563                                      | -0.162203                                   | -0.163147                                 | -0.164564                                    |
| HO <sub>2</sub>               | -150.987291                                    | -150.961316                                 | -150.962260                               | -150.965118                                  |
| HNO                           | -130.538739                                    | -130.513703                                 | -130.514647                               | -130.517486                                  |
| H <sub>2</sub> O              | -76.469244                                     | -76.447816                                  | -76.448761                                | -76.451596                                   |
| CO <sub>2</sub>               | -188.675068                                    | -188.650807                                 | -188.651751                               | -188.654375                                  |
| CO <sub>2</sub> <sup>-</sup>  | -188.761979                                    | -188.734761                                 | -188.735705                               | -188.738661                                  |
| HCOO <sup>-</sup>             | -189.395611                                    | -189.367877                                 | -189.368822                               | -189.371801                                  |
| CO <sub>3</sub> <sup>2-</sup> | -264.181723                                    | -264.152686                                 | -264.153630                               | -264.156828                                  |
| <i>c</i> -HCOOH               | -189.841212                                    | -189.812983                                 | -189.813927                               | -189.817145                                  |
| <i>t</i> -HCOOH               | -189.842929                                    | -189.814720                                 | -189.815664                               | -189.818847                                  |

|                            |             |             |             |             |
|----------------------------|-------------|-------------|-------------|-------------|
| $\text{CH}_2\text{OH}$     | -115.105161 | -115.077817 | -115.078761 | -115.082152 |
| $\text{HCO}_3^-$           | -264.675631 | -264.645403 | -264.646347 | -264.649873 |
| $\text{CH}_3\text{OH}$     | -115.753655 | -115.726527 | -115.727472 | -115.730849 |
| $\text{CH}(\text{OH})_2$   | -190.365566 | -190.335058 | -190.336002 | -190.340023 |
| $\text{H}_2\text{CO}_3$    | -265.117312 | -265.086682 | -265.087626 | -265.091392 |
| $\text{CH}_2(\text{OH})_2$ | -191.013510 | -190.983652 | -190.984597 | -190.988513 |
| $\text{O}^-$               | -75.295983  | -75.279053  | -75.279997  | -75.281413  |
| $\text{O}_2$               | -150.400984 | -150.377712 | -150.378656 | -150.381019 |
| $\text{OH}$                | -75.781604  | -75.761370  | -75.762314  | -75.764675  |
| $\text{OH}^-$              | -75.971629  | -75.952076  | -75.953020  | -75.955380  |
| $\text{ONCO}_2^-$          | -318.752138 | -318.718765 | -318.719709 | -318.724338 |

**Table S3.** The predicted Gibb's free energy changes of the relevant reactions in water using the B3LYP density functional theory method with basis sets of aug-cc-pVTZ and C-PCM to account for the solvent effect.

| Reaction                                                                                       | $\Delta G$<br>Hartree | $\Delta G$<br>kcal mol <sup>-1</sup> | Reaction                                                                                                | $\Delta G$<br>Hartree | $\Delta G$<br>kcal mol <sup>-1</sup> |
|------------------------------------------------------------------------------------------------|-----------------------|--------------------------------------|---------------------------------------------------------------------------------------------------------|-----------------------|--------------------------------------|
| $\text{NO}_2^- + \text{OH} \rightarrow \text{NO}_2 + \text{OH}^-$                              | -0.006729             | -4.22                                | $\text{CH}(\text{OH})_2 + \text{NO} \rightarrow t\text{-HCOOH} + \text{HNO}$                            | -0.056782             | -35.63                               |
| $\text{NO}_2 + \text{NO} \rightarrow \text{N}_2\text{O}_3$                                     | 0.000042              | 0.03                                 | $\text{CH}(\text{OH})_2 + \text{CH}(\text{OH})_2 \rightarrow \text{CH}_2(\text{OH})_2 + c\text{-HCOOH}$ | -0.123590             | -77.53                               |
| $\text{NO}_2 + \text{NO}_2 \rightarrow \text{N}_2\text{O}_4$                                   | -0.000445             | -0.28                                | $\text{CH}(\text{OH})_2 + \text{CH}(\text{OH})_2 \rightarrow \text{CH}_2(\text{OH})_2 + t\text{-HCOOH}$ | -0.125307.            | -78.60                               |
| $\text{NO} + \text{OH} \rightarrow c\text{-HONO}$                                              | -0.058031             | -36.42                               | $\text{HCOO}^- + \text{OH} \rightarrow \text{CO}_2^- + \text{H}_2\text{O}$                              | -0.054008             | -33.89                               |
| $\text{NO} + \text{OH} \rightarrow t\text{-HONO}$                                              | -0.059712             | -37.47                               | $\text{NO} + \text{CO}_2^- \rightarrow \text{ONCO}_2^-$                                                 | -0.030839             | -19.35                               |
| $\text{CH}_2(\text{OH})_2 + \text{OH} \rightarrow \text{CH}(\text{OH})_2 + \text{H}_2\text{O}$ | -0.039696             | -24.91                               | $\text{ONCO}_2^- \rightarrow \text{NO} + \text{CO}_2^-$                                                 | 0.030839              | 19.35                                |
| $\text{CH}(\text{OH})_2 + \text{OH} \rightarrow c\text{-HCOOH} + \text{H}_2\text{O}$           | -0.163286             | -102.46                              | $\text{ONCO}_2^- \rightarrow \text{NO}^- + \text{CO}_2$                                                 | 0.043156              | 27.08                                |
| $\text{CH}(\text{OH})_2 + \text{OH} \rightarrow t\text{-HCOOH} + \text{H}_2\text{O}$           | -0.165003             | -103.54                              | $\text{NO}^- + \text{H}_2\text{O} \rightarrow \text{HNO}$                                               | -0.007210             | -4.52                                |
| $\text{CH}(\text{OH})_2 + \text{NO} \rightarrow c\text{-HCOOH} + \text{HNO}$                   | -0.055065             | -34.55                               | $\text{HNO} + \text{HNO} \rightarrow \text{N}_2\text{O} + \text{H}_2\text{O}$                           | -0.142084             | -89.16                               |
